# Supplementary material for: Fecal Calprotectin in Patients with Crohn’s Disease: A Study Based on the History of Bowel Resection and Location of Disease
Source: MDPI journal article supplement (doi:10.3390/diagnostics14080854), 2024-04-22
Supplement: s1 [file s1]

Supplementary Figure S1.

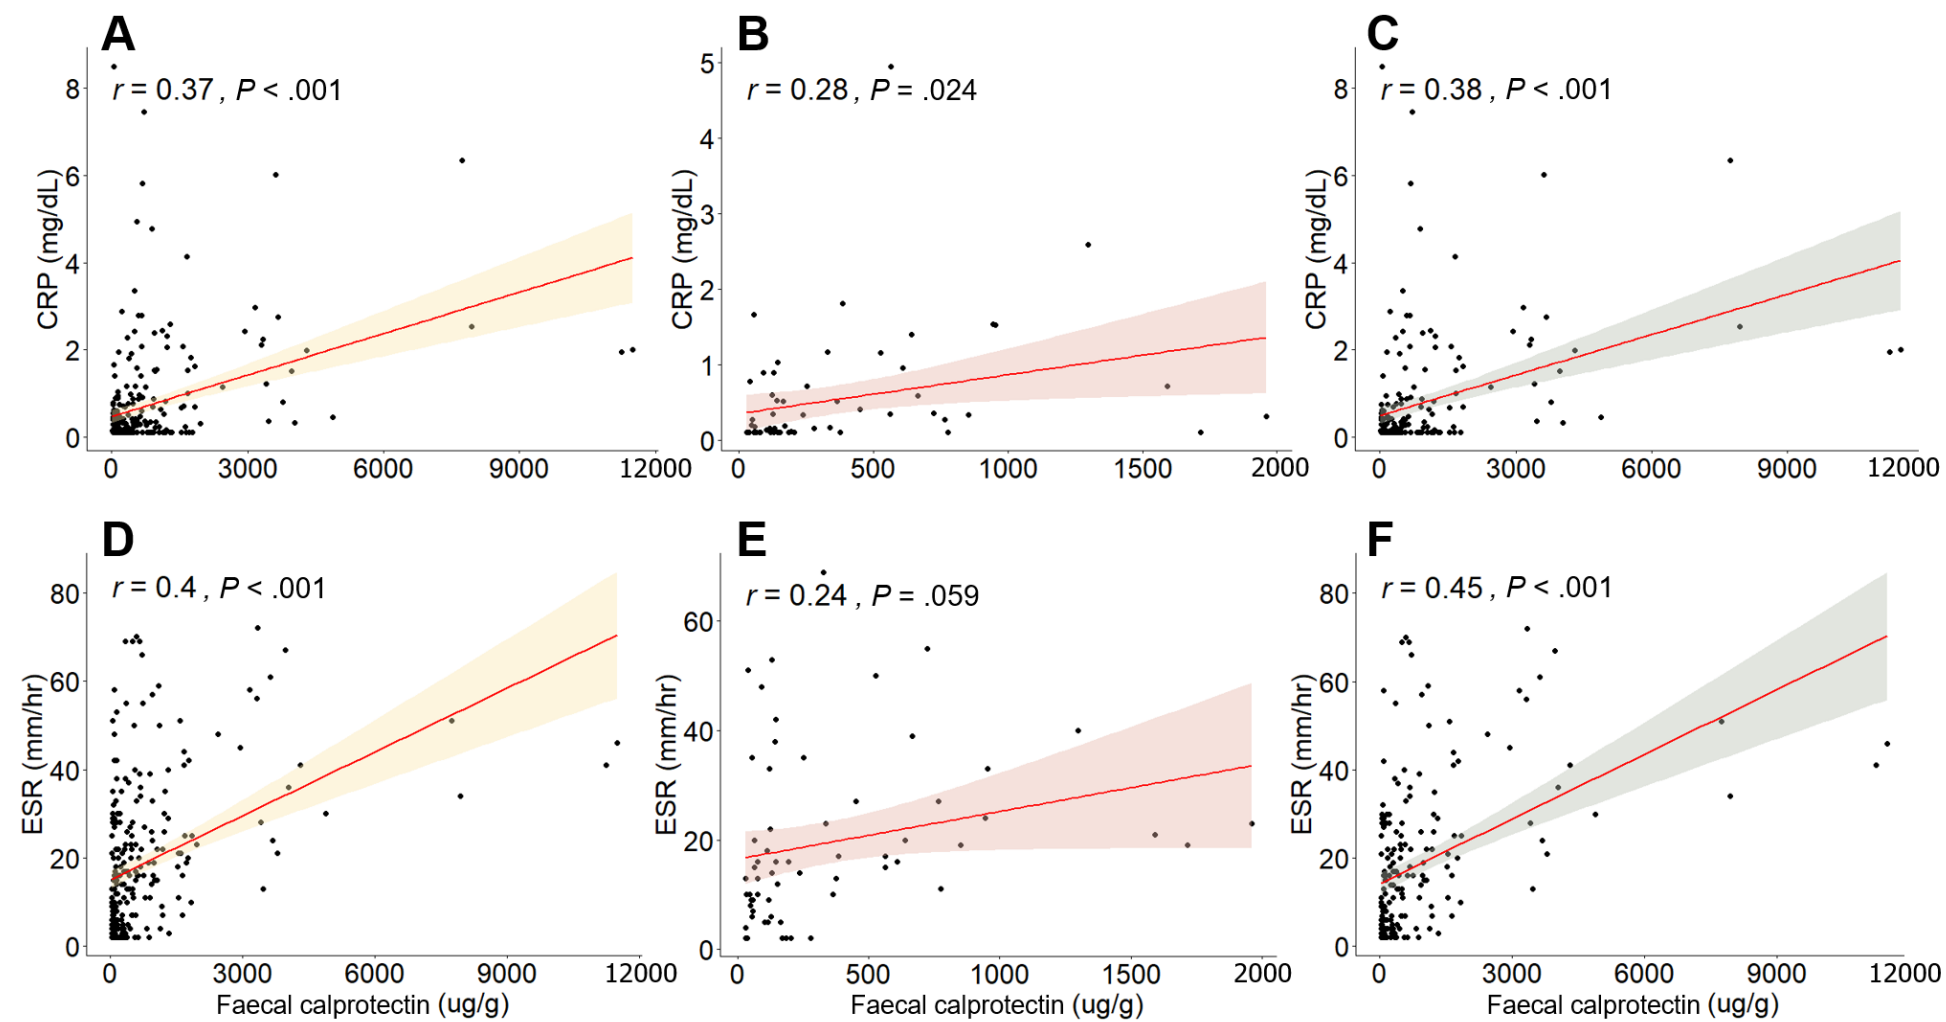

**Supplementary Figure 1.** Scatter plot of (A), (B), (C) CRP against FC, (D), (E), (F) ESR against FC for all, operated patients and non-operated patients, respectively.

Abbreviations: FC, faecal calprotectin; CRP, C-reactive protein; ESR, erythrocyte sedimentation rate
