# Supplementary material for: Fecal Calprotectin in Patients with Crohn’s Disease: A Study Based on the History of Bowel Resection and Location of Disease
Source: MDPI journal article supplement (doi:10.3390/diagnostics14080854), 2024-04-22
Supplement: s1 [file s1]

**Supplementary Table S1.** Diagnostic accuracy of faecal calprotectin, CRP, and CDAI in discriminating between active disease and remission in patients with Crohn's disease with history of bowel resection

|                                                                          | Sensitivity (%) | Specificity (%) | PPV (%) | NPV (%) | AUROC (95% CI)      |
|--------------------------------------------------------------------------|-----------------|-----------------|---------|---------|---------------------|
| <b>Patients with history of bowel resection, any location of disease</b> |                 |                 |         |         |                     |
| FC cut-off (ug/g)                                                        |                 |                 |         |         | 0.908 (0.860-0.984) |
| 50                                                                       | 89.3            | 42.9            | 92.6    | 33.3    |                     |
| 70.8 (Youden test)                                                       | 83.9            | 100.0           | 100.0   | 43.8    |                     |
| 100                                                                      | 76.8            | 100.0           | 100.0   | 35.0    |                     |
| 200                                                                      | 46.4            | 100.0           | 100.0   | 18.9    |                     |
| CRP cut-off (mg/l)                                                       |                 |                 |         |         | 0.735 (0.490-0.893) |
| 0.11 (Youden test)                                                       | 67.9            | 85.7            | 97.4    | 25.0    |                     |
| 0.25                                                                     | 50.9            | 85.7            | 96.6    | 18.2    |                     |
| 0.5                                                                      | 35.7            | 85.7            | 95.2    | 14.3    |                     |
| 0.8                                                                      | 21.4            | 85.7            | 92.3    | 0.12    |                     |
| CDAI cut-off                                                             |                 |                 |         |         | 0.620 (0.446-0.783) |
| 66.8 (Youden test)                                                       | 60.7            | 71.4            | 94.4    | 18.5    |                     |
| 150                                                                      | 33.9            | 85.7            | 95.0    | 14.0    |                     |

| Patients with history of bowel resection, small bowel involvement only |      |       |       |      |                     |
|------------------------------------------------------------------------|------|-------|-------|------|---------------------|
| FC cut-off (ug/g)                                                      |      |       |       |      | 0.867 (0.736-0.962) |
| 50                                                                     | 83.3 | 42.9  | 86.2  | 37.5 |                     |
| 70.8 (Youden test)                                                     | 76.7 | 100.0 | 100.0 | 0.5  |                     |
| 100                                                                    | 66.7 | 100.0 | 100.0 | 41.2 |                     |
| 200                                                                    | 43.3 | 100.0 | 100.0 | 29.2 |                     |
| CRP cut-off (mg/l)                                                     |      |       |       |      | 0.676 (0.443-0.850) |
| 0.11 (Youden test)                                                     | 56.7 | 85.7  | 94.4  | 31.6 |                     |
| 0.25                                                                   | 36.7 | 85.7  | 91.7  | 24.0 |                     |
| 0.5                                                                    | 20.0 | 85.7  | 85.7  | 20.0 |                     |
| 0.8                                                                    | 10.0 | 85.7  | 75.0  | 18.2 |                     |
| CDAI cut-off                                                           |      |       |       |      | 0.643 (0.433-0.824) |
| 70.6 (Youden test)                                                     | 66.7 | 71.4  | 90.1  | 33.3 |                     |
| 150                                                                    | 33.3 | 85.7  | 90.1  | 23.1 |                     |

Abbreviations: CRP, C-reactive protein; CDAI, Crohn's disease activity index; FC, faecal calprotectin; AUROC, area under the receiver operating characteristic curve; CI, confidence interval

**Supplementary Table S2.** Summary of data from studies on FC in Crohn's disease patients with history of bowel resection<sup>10-12, 28, 29</sup>

| Study                 | Number of patients | Disease evaluation method | FC measurement method                       | AUROC | Cut-off level (ug/g) | Sensitivity (%) | Specificity (%) |
|-----------------------|--------------------|---------------------------|---------------------------------------------|-------|----------------------|-----------------|-----------------|
| Lobaton, 2013         | 29                 | Ileocolonoscopy           | Quantum Blue, Bühlmann                      | 0.933 | 272                  | 79              | 97              |
|                       |                    |                           | Calprotectin ELISA, Bühlmann                | 0.935 | 274                  | 77              | 97              |
| Yamamoto, 2013        | 20                 | Ileocolonoscopy           | Human Calprotectin ELISA Kit, Cell Sciences | -     | 170                  | 83              | 93              |
| Lasson, 2014          | 30                 | Ileocolonoscopy           | Calprotectin ELISA, Bühlmann                | -     | 100                  | 85              | 35              |
| Boschetti, 2015       | 86                 | Ileocolonoscopy           | Calprotectin ELISA, Bühlmann                | 0.86  | 100                  | 95              | 54              |
| Wright, 2015          | 135                | Ileocolonoscopy           | fCAL ELISA, Bühlmann                        | 0.763 | 100                  | 89              | 58              |
| Bachiller, 2016       | 97                 | Ileocolonoscopy           | Calprest, Eurospital                        | 0.74  | 60                   | 88              | 58              |
| Garcia-Planella, 2016 | 88                 | Ileocolonoscopy           | Calprest, Eurospital                        | 0.75  | 100                  | 70              | 64              |
| Lopes, 2016           | 99                 | Ileocolonoscopy           | EliA Calprotectin, Thermo Fisher Scientific | 0.831 | 100                  | 74              | 75              |
| Verdejo, 2018         | 86                 | Ileocolonoscopy           | Quantum Blue, Bühlmann                      | 0.698 | 62                   | 85.7            | 45.9            |
| Liu, 2019             | 90                 | Enteroscopy               | EK-CAL, Bühlmann                            | 0.844 | 276                  | 96              | 68              |
| Veyre, 2021           | 55                 | Ileocolonoscopy           | Calprotectin ELISA, Bühlmann                | 0.71  | 65                   | 96              | 31              |

Abbreviations: FC, faecal calprotectin; AUROC, area under the receiver operating characteristic curve; ELISA, enzyme-linked immunosorbent assay
